# Supplementary material for: Pinching dynamics, extensional rheology, and stringiness of saliva substitutes
Source: Royal Society of Chemistry journal article supplement (doi:10.1039/d3sm01662e), 2024-01-01

## Pinching Dynamics, Extensional Rheology, and Stringiness of Saliva Substitutes

Karim Al Zahabi,<sup>1</sup> Lena Hassan,<sup>1</sup> Ramiro Maldonado,<sup>1</sup> Michael W. Boehm<sup>2</sup>, Stefan K. Baier<sup>2,3</sup>,  
and Vivek Sharma<sup>1,\*</sup>

<sup>1</sup>Department of Chemical Engineering, University of Illinois at Chicago, Chicago, IL. 60607.

<sup>2</sup>Motif FoodWorks Inc., Boston, MA. 02210.

<sup>3</sup>School of Chemical Engineering, The University of Queensland, Brisbane, QLD 4072,  
Australia.

\*Address correspondence to: [viveks@uic.edu](mailto:viveks@uic.edu)

Submitted on Dec 03, 2023; Revised on Feb 7, 2024

**Table S1:** Zero-shear viscosity, apparent extensional relaxation time, terminal extensional viscosity, and terminal Trouton ratio for Fusayama-Meyer artificial saliva (FM<sub>S</sub>) thickened with typical polysaccharide thickening agents.

| Rheology of Thickened Saliva Substitute (FM <sub>S</sub> ) |       |                 |                  |                          |                    |
|------------------------------------------------------------|-------|-----------------|------------------|--------------------------|--------------------|
| Thickener                                                  | wt. % | $\eta_0$ (Pa·s) | $\lambda_E$ (ms) | $\eta_{E^\infty}$ (Pa·s) | $Tr^\infty$ (Pa·s) |
| NaCMC<br>(250 kDa)                                         | 0.5   | 0.009           | --               | 0.9                      | 96                 |
|                                                            | 1.0   | 0.048           | 0.7              | 1.2                      | 25                 |
| NaCMC<br>(700 kDa)                                         | 0.5   | 0.15            | 1.7              | 2.1                      | 14                 |
|                                                            | 1.0   | 3.6             | 2.1              | 2.7                      | 0.8                |
| HEC<br>(720 kDa)                                           | 0.5   | 0.20            | 1.2              | 0.8                      | 4                  |
|                                                            | 1.0   | 4.3             | 2.1              | 2.9                      | 0.7                |

**Table S2:** Ingredient listed by the manufacturers for the five dry mouth treatments (DMTs) that are focus of an investigation into their shear and extensional rheology response.

| Substitute      | High-viscosity solvents    | Macromolecular Additives     | Other                                                                                                                                                                                                         |
|-----------------|----------------------------|------------------------------|---------------------------------------------------------------------------------------------------------------------------------------------------------------------------------------------------------------|
| OR <sub>A</sub> | glycerin, propylene glycol | HEC, poloxamer 407           | xylitol, sorbitol, sodium benzoate, caprylyl glycol, 1,2-hexanediol, hydroxyacetophenone, sodium phosphate, disodium phosphate                                                                                |
| OR <sub>B</sub> | glycerin, propylene glycol | HEC, poloxamer 407           | xylitol, sorbitol, sodium benzoate, sodium phosphate, disodium phosphate, potassium sorbate, cetylpyridinium choride                                                                                          |
| OR <sub>S</sub> | propylene glycol           | HEC, poloxamer 407, lysozyme | xylitol, sodium benzoate, mutanase, zinc gluconate, lactoferrin, lactoperoxidase, potassium thiocyanate, aloe vera, calcium lactate, glucose oxide, dextranase, hydrogenated starch hydrolysate, benzoic acid |
| OR <sub>O</sub> | glycerin, propylene glycol | NaCMC, NaHA, poloxamer 407   | xylitol, sodium benzoate, cetylpyridinium choride, benzoic acid                                                                                                                                               |
| MS <sub>E</sub> | --                         | NaCMC                        | sorbitol, sodium chloride, magnesium choride, calcium chloride, potassium chloride, dihydrogen phosphate                                                                                                      |

**Figure S1:** Radius evolution for three replicate trials of pinching videos obtained via dripping-onto-substrate (DoS) rheometry for the dry mouth treatments from Biotene (OR<sub>B</sub>) and Oral-B (OR<sub>O</sub>).

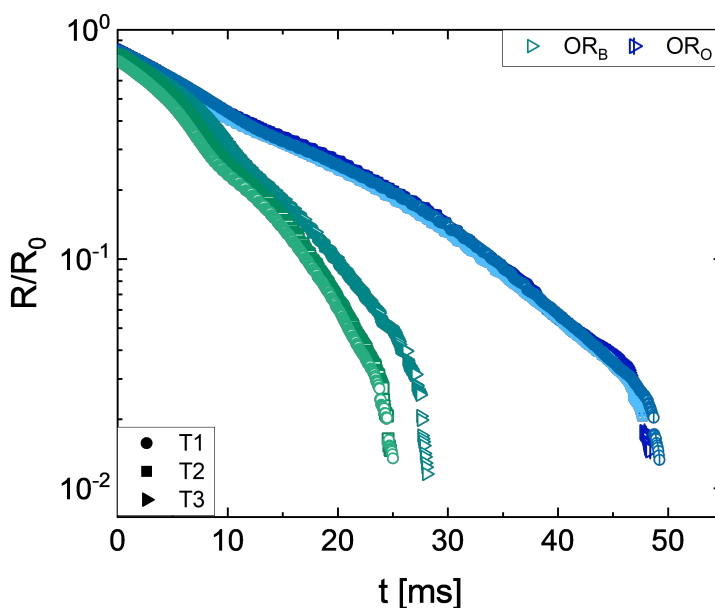

**Figure S2:** Apparent surface tension plotted as a function of surface age for two dry mouth treatments from Amazon (OR<sub>A</sub>) and Oral-B (OR<sub>O</sub>), obtained via maximum bubble tensiometry.

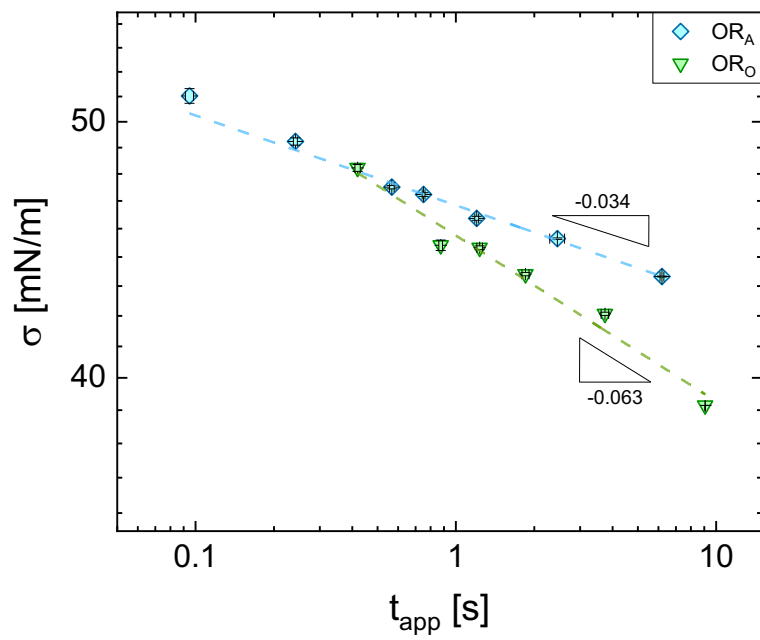

Supplement: d3sm01662e1.pdf [file d3sm01662e1.pdf]
